# Supplementary material for: IgM-associated gut bacteria in obesity and type 2 diabetes in C57BL/6 mice and humans
Source: Springer Nature journal article supplement (doi:10.1007/s00125-022-05711-8), 2022-05-19
Supplement: MOESM1 [file 125_2022_5711_MOESM1_ESM.pdf]

## Electronic Supplementary Materials:

ESM Methods

ESM Table 1 - Obese human youth microbial stool donor information.

ESM Table 2 - qPCR primer sequence details

ESM Table 3 – Flow cytometry monoclonal antibody details

ESM Fig. 1 - Glucose tolerance test results from the obese human youth microbial stool donors

ESM Fig. 2 – Body weight, glucose tolerance and insulin tolerance results from standard food-fed *Aid*<sup>-/-</sup> mice and WT mice

ESM Fig. 3 – B cells in the VAT

ESM Fig. 4 – Macrophages are increased in the lymphoid tissue of AID-deficient mice

ESM Fig. 5 – IgG infusion of *Aid*<sup>-/-</sup> mice does not alter Treg cells proportion from lymphoid tissues

## ESM Methods

### *Extraction of gut bacterial DNA*

For investigation of the total microbial community, colonic contents or fecal pellets were collected from the mice on both standard and HFD at the time of termination (16 weeks after commencement of HFD). To extract the bacterial DNA, fecal samples (~15-25mg/mouse) were re-suspended in 300µl Tris-EDTA and incubated for one hour at 37°C in the presence of 7.5µl Sodium dodecyl sulfate (0.5%) and 3µl Proteinase K (20mg/ml). One volume of phenol:chloroform:isoamyl alcohol (25:24:1), 200µl of 20% SDS and 0.3g of zirconium/silica beads (0.1mm, Biospec Inc, USA) were added and samples were mixed with a Mini-bead-beater for 2mins. The sample was then mixed with 820µl of phenol:chloroform:isoamyl alcohol (25:24:1), centrifuged and the aqueous layer collected into a new tube. The bacterial DNA was precipitated with 0.6 volumes of isopropanol, washed with 70% ethanol, air-dried and re-suspended in 100µl of sterile water.

### *16S rRNA sequencing*

The V4 region of the bacterial 16S ribosomal gene was amplified from each DNA sample with barcoded, broadly conserved bacterial primers (forward, 5'-CATGCTGCCTCCCGTAGGAGT-3'; reverse, 5'-TCAGAGTTTGATCCTGGCTCAG-3'). PCR products were purified (QIAGEN gel extraction kit) and quantified (Nanodrop spectrophotometer), and equimolar amounts of each sample were pooled and pyrosequenced on an Ion Torrent Personal Genome Machine (PGM) sequencing system (Life Technologies, USA).

| ID | Medications                                                    | Group | Age (years) | Sex | Race             | Height (cm) | Weight (kg) | BMI   | Body fat (%) | HbA <sub>1c</sub> (mmol/mol) | HbA <sub>1c</sub> (%) | Cholesterol (mmol/l) | HDL Cholesterol (mmol/l) | LDL Cholesterol (mmol/l) | Triglycerol (mmol/l) | ALT (U/l) | AST (U/l) |
|----|----------------------------------------------------------------|-------|-------------|-----|------------------|-------------|-------------|-------|--------------|------------------------------|-----------------------|----------------------|--------------------------|--------------------------|----------------------|-----------|-----------|
| 10 | None                                                           | NGT   | 13.6        | M   | Hispanic         | 166         | 104.6       | 37.96 | 44.8         | 32.2                         | 5.1                   | 9.1                  | 1.5                      | 12.5                     | 5.1                  | 88        | 50        |
| 11 | None                                                           | NGT   | 12.5        | M   | Hispanic         | 163         | 81.4        | 30.64 | 47.4         | 41.0                         | 5.9                   | 5.9                  | 1.8                      | 3.1                      | 4.9                  | 24        | 19        |
| 13 | None                                                           | NGT   | 13.2        | F   | African American | 169         | 98.2        | 34.38 | 44.9         | 35.5                         | 5.4                   | 10.1                 | 2.9                      | 6.7                      | 2.8                  | 14        | 19        |
| 28 | Singulair                                                      | NGT   | 9.9         | M   | Caucasian        | 148         | 61.4        | 28.03 | 48.4         | 39.9                         | 5.8                   | 9.7                  | 2.9                      | 6.3                      | 2.2                  | 11        | 21        |
| 29 | Flovent inhaler; Salbutamol (Albuterol); Zyrtec                | NGT   | 9.7         | F   | Caucasian        | 154         | 104.2       | 43.94 | 53.7         | 36.6                         | 5.5                   | 7.7                  | 1.9                      | 4.5                      | 6.2                  | 22        | 21        |
| 31 | None                                                           | NGT   | 8           | M   | Caucasian        | 154         | 85          | 35.84 | 50.2         | 38.8                         | 5.7                   | 7.3                  | 2.7                      | 3.7                      | 4.3                  | 20        | 23        |
| 36 | Lamictal, Topamax, Carbitrol                                   | NGT   | 15.1        | F   | Caucasian        | 166         | 104.6       | 37.96 | 50.1         | 34.4                         | 5.3                   | 8.9                  | 2.7                      | 5.3                      | 4.7                  | 11        | 12        |
| 52 | Pulacort; Singulair                                            | NGT   | 7           | F   | Hispanic         | 143         | 73.6        | 35.99 | 46.7         | 34.4                         | 5.3                   | 7.8                  | 1.7                      | 4.9                      | 6.0                  | 34        | 29        |
| 57 | None                                                           | NGT   | 12.4        | M   | Caucasian        | 166         | 108.2       | 39.27 | 58.4         | 34.4                         | 5.3                   | 10.2                 | 2.4                      | 6.4                      | 6.6                  | 33        | 22        |
| 58 | None                                                           | NGT   | 15.2        | M   | Caucasian        | 182         | 109.2       | 32.97 | 33           | 35.5                         | 5.4                   | 6.9                  | 2.6                      | 3.4                      | 4.4                  | 55        | 52        |
| 60 | None                                                           | NGT   | 13.1        | M   | African American | 174         | 94.4        | 31.18 | 45.1         | 27.9                         | 4.7                   | 8.9                  | 2.5                      | 4.6                      | 9.1                  | 9         | 14        |
| 66 | Salbutamol (Albuterol); Flovent; Metformin; Singulair; Nasonex | NGT   | 11.7        | F   | Hispanic         | 177         | 144         | 45.96 | n/a          | 34.4                         | 5.3                   | 7.0                  | 2.2                      | 4.1                      | 3.6                  | 12        | 15        |

|     |                                              |     |      |   |                  |     |       |                     |      |      |     |      |     |     |      |    |    |
|-----|----------------------------------------------|-----|------|---|------------------|-----|-------|---------------------|------|------|-----|------|-----|-----|------|----|----|
| 69  | Salbutamol (Albuterol); Singulair; Symbacort | NGT | 13   | M | Hispanic         | 161 | 86.1  | 33.22               | 36.8 | 35.5 | 5.4 | 7.7  | 2.9 | 3.6 | 5.9  | 20 | 25 |
| 70  | Salbutamol (Albuterol); Resta pump; Claritin | NGT | 13.9 | M | African American | 173 | 115   | 38.42               | 48.8 | 36.6 | 5.5 | 7.8  | 2.6 | 4.8 | 2.3  | 19 | 21 |
| 78  | Hydrocortisone                               | NGT | 11.4 | F | Hispanic         | 157 | 115.4 | 46.82               | 57.9 | 33.3 | 5.2 | 6.7  | 2.6 | 3.1 | 4.7  | 10 | 6  |
| 7   | None                                         | IGT | 14.7 | F | African American | 171 | 115.6 | 39.53               | 52   | 42.1 | 6   | 8.1  | 2.5 | 4.2 | 6.6  | 66 | 34 |
| 8   | None                                         | IGT | 13.6 | F | Hispanic         | 163 | 90.6  | 34.1                | 45.7 | 43.2 | 6.1 | 9.1  | 2.3 | 5.1 | 8.4  | 40 | 32 |
| 32  | None                                         | IGT | 7.2  | F | Caucasian        | 122 | 29.6  | 19.89               | 29.6 | 35.5 | 5.4 | 5.5  | 2.8 | 1.8 | 4.4  | 39 | 36 |
| 38  | None                                         | IGT | 13.5 | M | Hispanic         | 173 | 98.8  | 33.01               | 45.8 | 41.0 | 5.9 | 9.8  | 3.7 | 5.2 | 4.7  | 23 | 24 |
| 46  | Flovent; Salbutamol (Albuterol)              | IGT | 16.3 | F | African American | 160 | 93    | 36.32<br>8125       | 50.1 | 37.7 | 5.6 | 10.1 | 3.0 | 6.4 | 3.3  | 10 | 16 |
| 63  | Cipro; Bactrim                               | IGT | 15.6 | M | Hispanic         | 173 | 102.8 | 34.34<br>79568<br>3 | 49.4 | 38.8 | 5.7 | 12.3 | 2.7 | 7.5 | 10.9 | 37 | 25 |
| 72  | None                                         | IGT | 12.1 | M | Hispanic         | 163 | 81.1  | 30.52               | 46   | 6.8  | 5.9 | 10.7 | 2.7 | 6.6 | 7.2  | 29 | 27 |
| 65  | None                                         | T2D | 20.1 | M | Hispanic         | 179 | 123.2 | 38.45               | 29.1 | 38.8 | 5.7 | 10.2 | 1.4 | 5.5 | 27.5 | 57 | 27 |
| 82  | None                                         | T2D | 10.5 | F | African American | 153 | 122   | 51.28               | 54   | 45.4 | 6.3 | 8.7  | 2.5 | 4.4 | 11.1 | 42 | 28 |
| 104 | None                                         | T2D | 11   | M | African American | 171 | 107.5 | 36.76               | 56   | 48.6 | 6.6 | 6.9  | 2.0 | 3.6 | 3.3  | 20 | 22 |
| 116 | None                                         | T2D | 8    | F | Hispanic         | 136 | 72.1  | 38.98               | 51.5 | 54.1 | 7.1 | 8.8  | 2.1 | 5.8 | 4.6  | 23 | 23 |

|     |      |     |    |   |                  |     |     |       |      |      |     |     |     |     |     |    |    |
|-----|------|-----|----|---|------------------|-----|-----|-------|------|------|-----|-----|-----|-----|-----|----|----|
| 120 | None | T2D | 18 | M | African American | 163 | 119 | 45.38 | 48.8 | 61.7 | 7.8 | 8.2 | 2.4 | 4.8 | 4.8 | 20 | 25 |
|-----|------|-----|----|---|------------------|-----|-----|-------|------|------|-----|-----|-----|-----|-----|----|----|

**ESM Table 1.** Obese human youth microbial stool donor information. Donors were recruited from the Yale Pediatric Obesity Clinic prior to receiving any medication. Individuals were assessed for glucose (see Fig. S1), lipid metabolism and liver function (ALT/AST). Stool donors were grouped into one of three groups (n=5/group) depending on their glucose tolerance results. Individuals in yellow indicate those microbial donors used for FMT experiments, while those in italics indicate those from which IgM+ and IgM- bacteria were sorted from for analysis. Abbreviations include: Normal glucose tolerant (NGT), Impaired glucose tolerant (IGT), Type 2 diabetes (T2D), Male (M), Female (F), Body mass index (BMI), Hemoglobin (Hb), High-density lipoprotein cholesterol (HDL-cholesterol), low-density lipoprotein cholesterol (LDL-cholesterol), Alanine aminotransferase (ALT) and Aspartate aminotransferase (AST).

| <b>Gene Name</b>                                                          | <b>Forward Primer Sequence (5'-3')</b> | <b>Reverse Primer Sequence (5'-3')</b> |
|---------------------------------------------------------------------------|----------------------------------------|----------------------------------------|
| <i>Tumor necrosis factor <math>\alpha</math> (Tnf<math>\alpha</math>)</i> | CAAATGGCCTCCCTCTCAT                    | TGGGCTACAGGCTTGCTACT                   |
| <i>Interleukin-10 (Il-10)</i>                                             | TGAATTCCCTGGGTGAGAAG                   | TCACTCTTCACCTGCTCCACT                  |
| <i>Glyceraldehyde 3-phosphate dehydrogenase (Gapdh)</i>                   | TGACATCAAGAAGGTGGTGAAG                 | TGCTGTAGCCGTATTCATTGTC                 |
| <i>Reg3<math>\gamma</math></i>                                            | TTCCTGTCCTCCATGATCAAAA                 | CATCCACCTCTGTTGGGTTCA                  |

**ESM Table 2.** qPCR primer sequence details. A list of the six qPCR primer sequences used in the murine study.

| <b>Antibody Target</b> | <b>Clone</b>   | <b>Supplier</b> | <b>Catalogue No.</b> | <b>RRID</b> |
|------------------------|----------------|-----------------|----------------------|-------------|
| CD1d                   | K253           | BioLegend       | 140805               | AB_10643277 |
| CD4                    | GK1.5          | BioLegend       | 100428               | AB_493647   |
| CD8 $\alpha$           | 53-6.7         | BioLegend       | 100722               | AB_312761   |
| CD11b                  | M1/70          | BioLegend       | 101224               | AB_755986   |
| CD11c                  | N418           | BioLegend       | 117318               | AB_493568   |
| CD19                   | 6D5            | BioLegend       | 115530               | AB_830707   |
| CD45                   | 30-F11         | BioLegend       | 103132               | AB_893340   |
| FoxP3                  | FJK-16s        | eBioscience     | 12-5773-82           | AB_465936   |
| IFN $\gamma$           | XMG1.2         | BioLegend       | 505810               | AB_315404   |
| TCR $\beta$            | H57-597        | BioLegend       | 109220               | AB_893624   |
| TNF $\alpha$           | MP6-XT22       | BioLegend       | 506313               | AB_493328   |
| Human IgM              | HMH-88         | BioLegend       | 314508               | AB_493005   |
| Viability Dye          | not applicable | BioLegend       | 423102               |             |

**ESM Table 3.** Monoclonal antibodies used for flow cytometry. A list of the mAbs used in the murine studies.

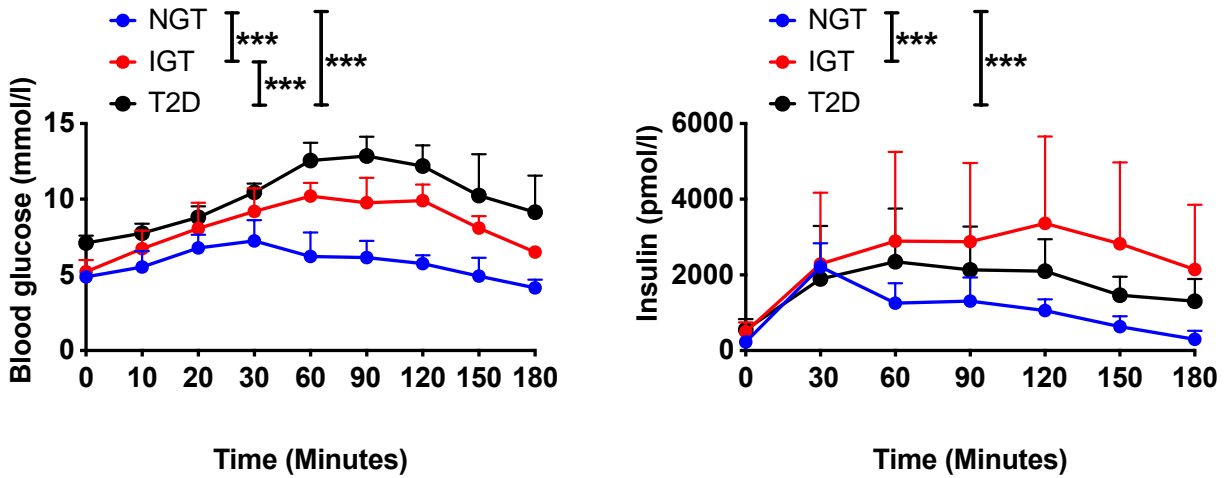

**ESM Fig. 1 – Glucose tolerance test results from the obese human youth microbial stool donors**

Individuals were fasted for 12 hours prior to oral administration of glucose and sequential testing of blood glucose (a) and insulin levels (b) over 180mins. Data were assessed for significance using a Two-way ANOVA. Data are presented as mean±SD. \*\*\* p<0.001.

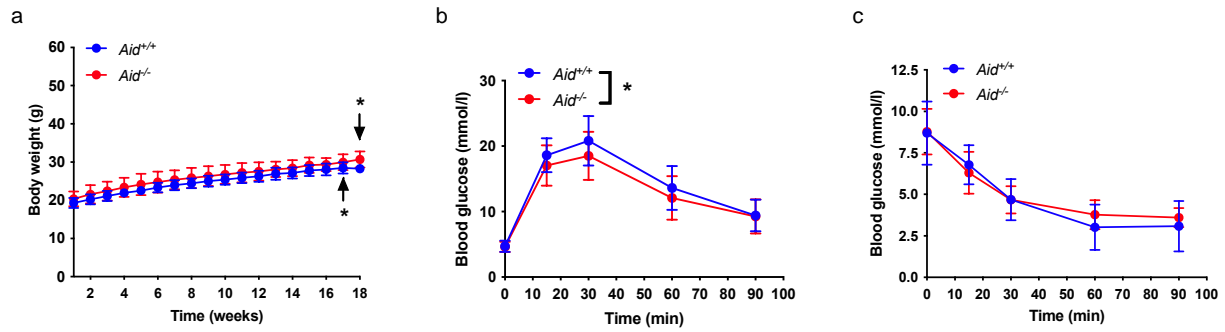

**ESM Fig. 2 – Body weight, glucose tolerance and insulin tolerance results from standard food-fed *Aid*<sup>-/-</sup> mice and WT mice**

a. Longitudinal assessment of body weight (g). Glucose (b) and insulin (c) tolerance tests in standard food-fed mice. Data were pooled from 2 separate experiments (n=13-14). Data were assessed for significance using a Student's t-test (a) or a Two-way ANOVA (b-c). Data are presented as mean±SD. \* p<0.05.



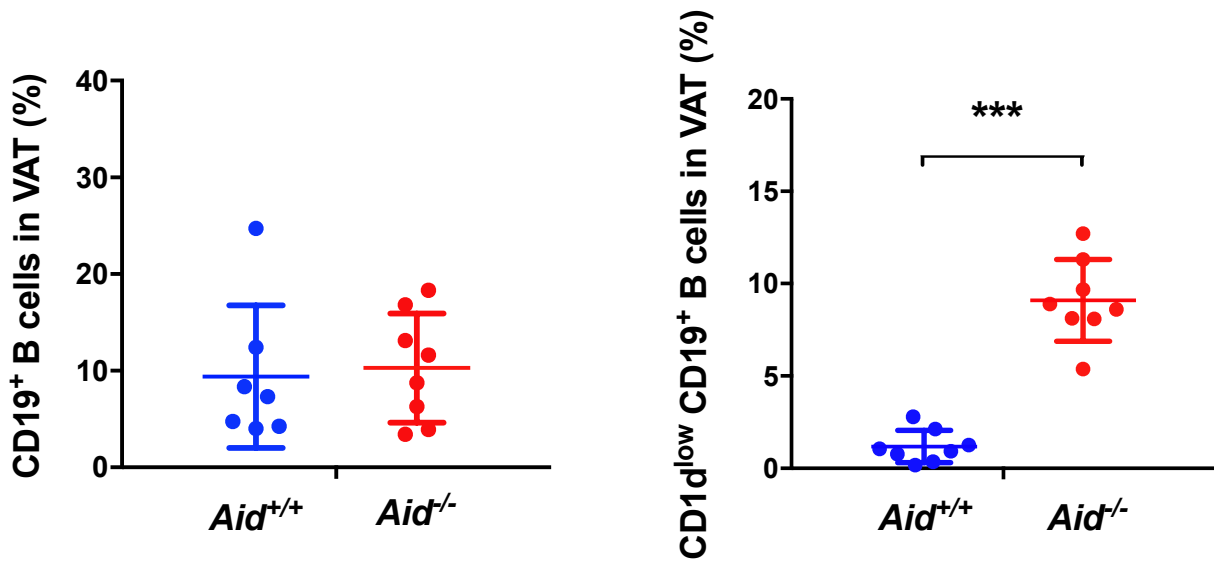

ESM Fig. 3 – B cells in VAT

a. The proportion of immune-infiltrating CD19<sup>+</sup> B cells in the VAT from male *Aid*<sup>+/+</sup> or *Aid*<sup>-/-</sup> mice fed a high-fat diet (HFD) for 16 weeks. b. The proportion of CD1d<sup>low</sup> CD19<sup>+</sup> B cells in VAT. Data were pooled from 2 separate experiments and were assessed for significance using a Student's t-test. Data are presented as mean±SD. \*\*\* p<0.001.

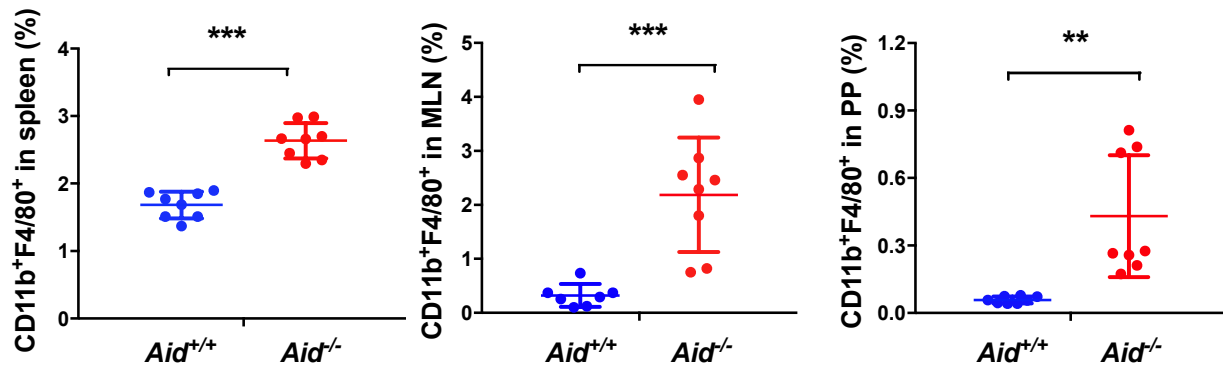

**ESM Fig. 4 – Macrophages are increased in lymphoid tissue of AID-deficient mice**

The proportion of CD11b<sup>+</sup>F4/80<sup>+</sup> cells in the VAT from male *Aid*<sup>+/+</sup> or *Aid*<sup>-/-</sup> mice fed a high-fat diet (HFD) for 16 weeks. Data were pooled from 2 separate experiments and were assessed for significance using a Student's t-test. Data are presented as mean±SD. \*\* p<0.01, \*\*\* p<0.001.

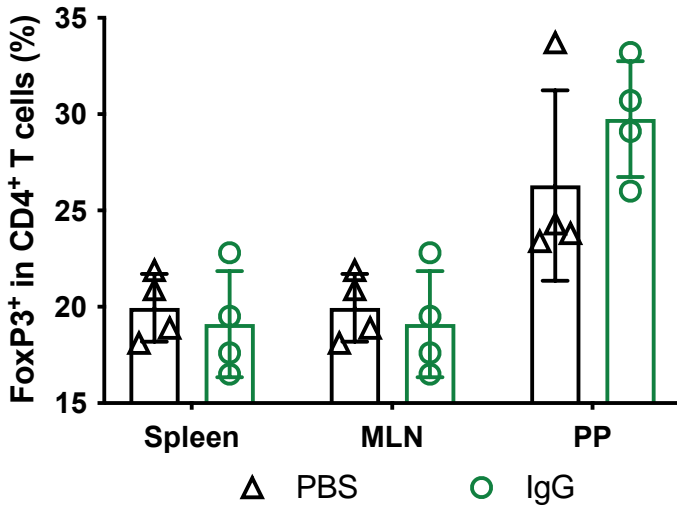

**ESM Figure 5 – IgG infusion of *Aid*<sup>-/-</sup> mice does not alter Treg cells proportion from lymphoid tissues**

Proportion of infiltrating Treg cells in the spleen, mesenteric lymph node or Peyer’s patches from HFD fed male *Aid*<sup>-/-</sup> mice i.v. injected with either purified polyclonal IgG or PBS. Treg cells were identified by flow cytometry, gated from live, single CD4<sup>+</sup> T cells prior to gating on FoxP3<sup>+</sup> cells. Data shown are from 1 of 2 experiments (n=4). Data were assessed for significance using a Student’s t-test. Data are presented as mean±SD.
